# Supplementary material for: Surviving to Acute Myocardial Infarction: The Role of Psychological Factors and Alexithymia in Delayed Time to Searching Care: A Systematic Review
Source: MDPI journal article supplement (doi:10.3390/jcm10173813), 2021-08-25
Supplement: s1 [file s1]

**Table S1. Included studies**

| FIRST AUTHOR AND YEAR OF PUBLICATION [reference] | COUNTRY     | STUDY DESIGN    | SAMPLE SIZE                                                                                                | PREHOSPITAL DELAY (PHD) or PATIENT DECISIONAL DELAY (PDD)           | CUT-OFF DELAY TIME (case-control studies)                                                                                  | PSYCHOLOGICAL FACTORS ASSOCIATED WITH PHD or PDD                                                                                                                                                                                                                                     | MACRO-CATEGORIES                     |
|--------------------------------------------------|-------------|-----------------|------------------------------------------------------------------------------------------------------------|---------------------------------------------------------------------|----------------------------------------------------------------------------------------------------------------------------|--------------------------------------------------------------------------------------------------------------------------------------------------------------------------------------------------------------------------------------------------------------------------------------|--------------------------------------|
| Abed et al., 2015 [37]                           | Jordan      | Cross-sectional | 299                                                                                                        | PHD: mean±sd=7.5±18.4 hours OK                                      |                                                                                                                            | Symptoms incongruence (mismatch between AMI experienced symptoms and expected ones); perceived AMI symptoms as not serious; anxiety                                                                                                                                                  | Symptoms appraisal                   |
| Albarqouni et al., 2016a [57]                    | Germany     | Survey          | 592                                                                                                        | PHD: median=200 (range 100–684) minutes OK                          |                                                                                                                            | Fear of death                                                                                                                                                                                                                                                                        | Other (fear of death)                |
| Al-Hassan & Omran., 2005 [36]                    | Jordan      | Cross-sectional | 79                                                                                                         | PDD: mean±sd =354±1265, minutes OK                                  | > 2 hours (delayers)                                                                                                       | Perceived seriousness about symptoms                                                                                                                                                                                                                                                 | Symptoms appraisal                   |
| Bleeker et al., 1995 [51]                        | Netherlands | Case-control    | 300                                                                                                        | PDD: media = ~ 30 minutes OK                                        | >30 minutes (delayers)                                                                                                     | Ignoring the symptoms; seeking distraction instead of social support; misinterpretation of symptoms as of cardiac origin; emotional denial                                                                                                                                           | Coping strategies                    |
| Burnett et al., 1995 [38]                        | US          | Case-control    | 453                                                                                                        | PDD: mean±sd = 3.05±4.97 hours OK                                   | ≥ 60 minutes (delayers)                                                                                                    | Attribution of symptoms to a non-cardiac origin; symptoms perceived as relatively mild; feeling less anxious or upset when symptoms were noticed and much control of the symptoms                                                                                                    | Symptoms appraisal                   |
| Cartabellotta et al., 2020 [19]                  | France      | Case-control    | 481 (among them, 271 answering a questionnaire also on psychological factors to be supposed impacting PDD) | Among 481 STEMI patients, PDD: median=87 (range: 0-1397) minutes OK | ≥ 154 minutes (delayers: median: 309 (range: 215.25-493.25) minutes; early callers: median 50 (range: 24.5-86.5) minutes). | Among 481 with available data from the clinical reports: the initial care provider different from Emergency Medical Service at the first symptoms presentation. Among 271 answering the questionnaire: the absence of sweats; the patient feeling that the situation was not severe. | Symptoms appraisal/Coping strategies |
| Carney et al., 2002 [35]                         | Ireland     | Survey          | 62                                                                                                         | PHD: mean±sd=2388.71±1083.55 minutes OK                             |                                                                                                                            | Attribution of symptoms to a non-cardiac origin; cardiac denial; chance health locus of control                                                                                                                                                                                      | Symptoms appraisal                   |
| Carta et al., 2013 [56]                          | Italy       | Case-control    | 83                                                                                                         | PHD: mean±sd=176.75±239.65 minutes OK                               | > 120 minutes (delayers)                                                                                                   | Alexithymia; contact with primary care before hospitalization                                                                                                                                                                                                                        | Alexithymia                          |

|                                  |                                 |                 |     |                                                                       |                      |                                                                                                                                                                                                                                                                                                                                         |                                      |
|----------------------------------|---------------------------------|-----------------|-----|-----------------------------------------------------------------------|----------------------|-----------------------------------------------------------------------------------------------------------------------------------------------------------------------------------------------------------------------------------------------------------------------------------------------------------------------------------------|--------------------------------------|
| Clark et al., 1992 [24]          | US                              | Case-control    | 315 | PHD: mean±sd=11.9±25.1 hours OK                                       | > 4 hours (delayers) | Wrong beliefs about symptoms etiology (i.e.: "Thought symptoms might not be a heart attack)                                                                                                                                                                                                                                             | Symptoms appraisal                   |
| Dracup et al., 1997 [26]         | Australia                       | Survey          | 317 | PHD: median=6.4 (interquartile range, 1.9-19.9) hours OK              |                      | Waiting to see if symptoms would go away; being too embarrassed to ask for an ambulance; being worried about troubling others; fear of what might happen if assistance was sought; knowing the nature of cardiac symptoms; failing to recognize the gravity of symptoms                                                                 | Symptoms appraisal/coping strategies |
| Dracup et al., 2003 [52]         | Australia, Japan, Korea, UK, US | Cross-sectional | 913 | PHD: mean±sd=17.3±45 hours OK                                         |                      | Wishing or praying for symptoms to go away; trying to relax; pretending nothing is wrong; trying not to think about the problem; taking medication; calling the physician; trying self-help remedy; telling someone nearby; calling EMS; going to a hospital without emergency medical services                                         | Coping strategies                    |
| Dracup & Moser, 1997 [25]        | US                              | Survey          | 277 | PHD: mean±sd=110±79 minutes OK                                        |                      | Cognitive and Emotional responses (symptoms assessed as intermittent; appraisal of the symptom as not serious; Attribution of symptoms to a non-cardiac origin; symptoms' underestimation; waiting for symptoms to go away; worrying about troubling others and refraining from seeking help; fear of the consequences of seeking help) | Symptoms appraisal/coping strategies |
| Fang et al., 2016 [54]           | Germany                         | Cross-sectional | 533 | PHD: median=203 (range: 101.5-695.0) minutes OK                       |                      | Denial                                                                                                                                                                                                                                                                                                                                  | Coping strategies                    |
| Fox-Wasylyshyn et al., 2010 [48] | Canada, US                      | Cross-sectional | 135 | PDD: median=2 mean±sd=11.8±23.7 (hours) OK                            |                      | Attribution of symptoms to a non-cardiac origin and emotion-focused coping                                                                                                                                                                                                                                                              | Symptoms appraisal/Coping strategies |
| Fukuoka et al., 2005 [27]        | Japan                           | Cross-sectional | 145 | PHD: median=3.34 hours OK                                             |                      | Interdependent construal of the Self                                                                                                                                                                                                                                                                                                    | Symptoms appraisal                   |
| Horne et al., 2000 [29]          | UK                              | Cross-sectional | 88  | PHD: mean±sd=7.3±14.2 (hours) OK                                      |                      | Mismatch between expected symptoms and experienced symptoms                                                                                                                                                                                                                                                                             | Symptoms appraisal                   |
| Hwang & Jeong, 2012 [41]         | Korea                           | Case-control    | 165 | PHD: median=12 hours OK                                               | > 6 hours (delayers) | Attribution of symptoms to a non-cardiac origin; presence of preinfarction angina pain                                                                                                                                                                                                                                                  | Symptom appraisal                    |
| Kentsch et al., 2002 [49]        | Germany                         | Case-control    | 739 | PHD: median=180 minutes (mean=622 minutes, range=4 minutes-7 days) OK | > 1 hours (delayers) | Emotional attitudes to AMI symptoms and inadequate coping strategies: waiting and see; symptoms gravity underestimation; worries about troubling others; Apparent improvement of the symptoms; asking others for advice; taking pain medication                                                                                         | Coping strategies                    |
| Kenyon et al., 1991 [55]         | US                              | Cross-sectional | 103 | PHD: mean±sd=9±10.8 hours OK                                          |                      | Somatic nonawareness; emotional nonawareness (alexithymia)                                                                                                                                                                                                                                                                              | Alexithymia                          |
| Khan et al., 2007 [40]           | Pakistan                        | Cross-sectional | 720 | PHD: mean±sd=12.3±1.7 hours OK                                        |                      | Lack of knowledge about symptoms of heart attack, low perceived severity of chest pain.                                                                                                                                                                                                                                                 | Symptom appraisal                    |

|                            |                                 |                                            |     |                                                                                                                                                             |                                                          |                                                                                                                                                                                                                                                                                           |                                      |
|----------------------------|---------------------------------|--------------------------------------------|-----|-------------------------------------------------------------------------------------------------------------------------------------------------------------|----------------------------------------------------------|-------------------------------------------------------------------------------------------------------------------------------------------------------------------------------------------------------------------------------------------------------------------------------------------|--------------------------------------|
| Khraim et al., 2009 [32]   | Jordan                          | Survey                                     | 134 | PDD: mean±sd=6.6±14.3 hours OK                                                                                                                              |                                                          | Waiting to see if symptoms would go away; perceived symptom seriousness; anxiety due to continued symptom presentation; embarrassment about getting help; worries about the possible outcome; worries about troubling others.                                                             | Symptoms appraisal                   |
| Lesneski, 2010 [46]        | US                              | Cross-sectional                            | 105 | PHD: mean±s=5.7±1.6 hours OK                                                                                                                                |                                                          | Misinterpretation of symptoms as of cardiac origin, having a low pain scale, thinking to be in control of the symptoms (i.e.: taking a medication, resting, trying to relax, praying, or wishing symptoms would go away)                                                                  | Symptoms appraisal/coping strategies |
| Li & Yu, 2017 [44]         | Hong Kong                       | Cross-sectional                            | 301 | PHD: median=3.0 (interquartile range: 1.84-10.30) hours OK                                                                                                  |                                                          | Failed attribution of symptoms to AMI; not being aware of one's own susceptibility to the condition; not having a good understanding of the manifestation of AMI                                                                                                                          | Symptoms appraisal                   |
| Li & Yu, 2018 [45]         | Hong Kong                       | Cross-sectional                            | 301 | PHD: median=3.0 (interquartile range: 1.84-10.30) hours OK                                                                                                  |                                                          | Perceived barriers to care seeking; poor congruence about AMI symptoms expectations; few typical AMI symptoms.                                                                                                                                                                            | Symptoms appraisal/coping strategies |
| McKinley et al., 2000 [30] | US, Canada, Australia           | Cross-sectional                            | 424 | PHD: median=90 minutes OK                                                                                                                                   | > 6 hours (delayers)                                     | Underestimation of the gravity of symptoms; waiting for symptoms to go away; worries about troubling others; attribution of symptoms to a non-cardiac origin; Attribution of symptoms to a non-cardiac origin; fearing the consequences of seeking help; embarrassment about seeking help | Symptoms appraisal                   |
| McKinley et al., 2004 [31] | US, South Korea, Japan, England | Survey                                     | 595 | PHD: median (interquartile range): US 3.5 (1.2–15.2) hours; South Korea 4.4 (1.8–13.3) hours; Japan 4.5 (2.0–16.3) hours and England 2.5 (1.5–8.7) hours OK |                                                          | Attribution of symptoms to a cardiac origin and not waiting for symptoms to go away                                                                                                                                                                                                       | Symptoms appraisal                   |
| Meloni et al., 2016 [47]   | Italy                           | Cross-sectional                            | 95  | PDD: mean=159 minutes, range 84-450 (alexithymic subjects N 27); mean=35 minutes, range 19–63 (non-alexithymic subjects N 68) OK                            |                                                          | High alexithymia; waiting for symptoms to go away.                                                                                                                                                                                                                                        | Alexithymia/Coping strategies        |
| Momeni et al., 2012 [43]   | Iran                            | Cross-sectional                            | 162 | PHD: mean±sd=7.4±16.25 hours OK                                                                                                                             |                                                          | Misinterpretation of symptoms as of cardiac origin; perception of symptoms as not serious.                                                                                                                                                                                                | Symptoms appraisal                   |
| Morgan, 2005 [42]          | US                              | Cross-sectional                            | 98  | PDD: median=93 minutes OK                                                                                                                                   |                                                          | Mismatch between experienced symptoms and expected ones                                                                                                                                                                                                                                   | Symptoms appraisal                   |
| Nymark et al., 2019 [39]   | Sweden                          | Cross-sectional (with a Case-control part) | 306 | PDD: median=3 (interquartile range 0.7–24) hours OK                                                                                                         | < 1 hour (short delayers);<br>> 12 hours (long delayers) | Perceived inability to act (i.e.: became paralyzed, lost control of themselves, became powerless, being frustrated and or unable to act despite persisting symptoms) and perceived symptom as not enough severe to seek medical care.                                                     | Symptoms appraisal/coping strategies |

|                            |                 |                 |     |                                                               |                      |                                                                                                                                                                                                                                                                                                                                                                                                |                                   |
|----------------------------|-----------------|-----------------|-----|---------------------------------------------------------------|----------------------|------------------------------------------------------------------------------------------------------------------------------------------------------------------------------------------------------------------------------------------------------------------------------------------------------------------------------------------------------------------------------------------------|-----------------------------------|
| O'Carrol et al., 2001 [34] | UK              | Case-control    | 72  | PHD: mean = 474.7;<br>median=167 (minutes) OK                 | > 4 hours (delayers) | Cardiac denial; "external" locus of control;<br>neuroticism                                                                                                                                                                                                                                                                                                                                    | Symptoms<br>appraisal/Alexithymia |
| Perry et al., 2001 [33]    | Not<br>reported | Cross sectional | 47  | PHD: mean±se =15.3±4.1;<br>median=4 (hours) OK                |                      | Mismatch between experienced and expected<br>symptoms; talking with someone during<br>symptom onset.                                                                                                                                                                                                                                                                                           | Symptoms appraisal                |
| Song et al., 2010 [23]     | China           | Survey          | 799 | PH: median=140 (interquartile<br>range=75-300) minutes OK     |                      | Symptoms interpretation as non-cardiac in<br>origin                                                                                                                                                                                                                                                                                                                                            | Symptoms appraisal                |
| Walsh et al., 2004 [53]    | Ireland         | Cross-sectional | 61  | PHD: median=244<br>(interquartile range 86–325)<br>minutes OK |                      | Low perceived threat; lack of emotional<br>response (i.e.: anxiety, tense, startled); lack of<br>active-cognitive coping style; lack of problem-<br>focused coping style                                                                                                                                                                                                                       | Coping strategies                 |
| Zegrean et al., 2009 [50]  | Canada, US      | Cross-sectional | 135 | PDD: mean±sd=2±23.7 hours<br>OK                               |                      | Coping strategies: trying to relax;<br>wishing/praying for symptoms to disappear;<br>discussing symptoms with someone; trying<br>not to think about symptoms; taking<br>nonprescription medications; trying other<br>home remedies; doing something to take<br>one's mind off the symptoms; engaging in<br>normal activities; persuading oneself and<br>others that the problem is not serious | Coping strategies                 |
| Zhang et al, 2020 [58]     | China           | Cross-sectional | 256 | PHD: median=150 minutes OK                                    |                      | Type D Personality tends to increase<br>awareness of the severity of AMI symptoms in<br>female (not in male) patients, leading to less<br>time spent on making decisions to seek care.                                                                                                                                                                                                         | Other (Type D personality)        |
